# Supplementary material for: Determination of high-confidence germline genetic variants in next- generation sequencing through machine learning models: an approach to reduce the burden of orthogonal confirmation
Source: Research Square preprint supplement (doi:10.21203/rs.3.rs-6513733/v1), 2025-05-13
Supplement: Supplementary file 1 [file b5dba3f968b2a9a71577f7c2.docx]

# Additional files

**Table S1: GIAB cell lines overview**

| **NIST ID** | **Corriell ID** | **Description** |
| --- | --- | --- |
| HG001 | NA12878 | UTAH CEPH female; Caucasian |
| HG002 | NA24385 | Ashkenazi Jewish son |
| HG003 | NA24149 | Ashkenazi Jewish father |
| HG004 | NA24143 | Ashkenazi Jewish mother |
| HG005 | NA24631 | Han Chinese son |
| HG006 | NA24694 | Han Chinese father |
| HG007 | NA24695 | Han Chinese mother |

**Table S2. Complete list of all candidate quality features for model training**

| **Features/Variables** | **Definition** |
| --- | --- |
| Read count | The number of 'countable' reads supporting the allele. Countable reads are defined based on the user-defined settings in the variant callers. |
| Coverage | The read coverage at this position. Only 'countable' reads are considered. |
| Frequency | 'Count' divided by 'Coverage' |
| Forward count | The number of 'countable' forward reads supporting the allele |
| Reverse count | The number of 'countable' reverse reads supporting the allele |
| Forward/Reverse ratio | ‘Forward count’ divided by ‘Reverse count’ |
| Average quality | The average base quality score of the bases supporting a variant. |
| Probability | posterior probability of the particular site-type called. |
| Read position probability | The test probability for the test of whether the distribution of the read positions variant in the variant carrying reads is different from that of all the reads covering the variant position. |
| Read direction probability | The test probability for the test of whether the distribution among forward and reverse reads of the variant carrying reads is different from that of all the reads covering the variant position |
| Homopolymer | The column contains "1" if the variant is likely to be a homopolymer error and "0" if not. This is assessed by inspecting all variants in homopolymeric regions longer than 2. A variant will get the mark "1" if it is a homopolymeric length variation of the reference allele, or a length variation of another variant that is a homopolymeric variation of the reference allele. |
| Homopolymer length | homopolymer length |
| Complex region | region with known homology and/or low mappability |

**Figure S3. Density plots for eight selected key features between true positives and false positives**


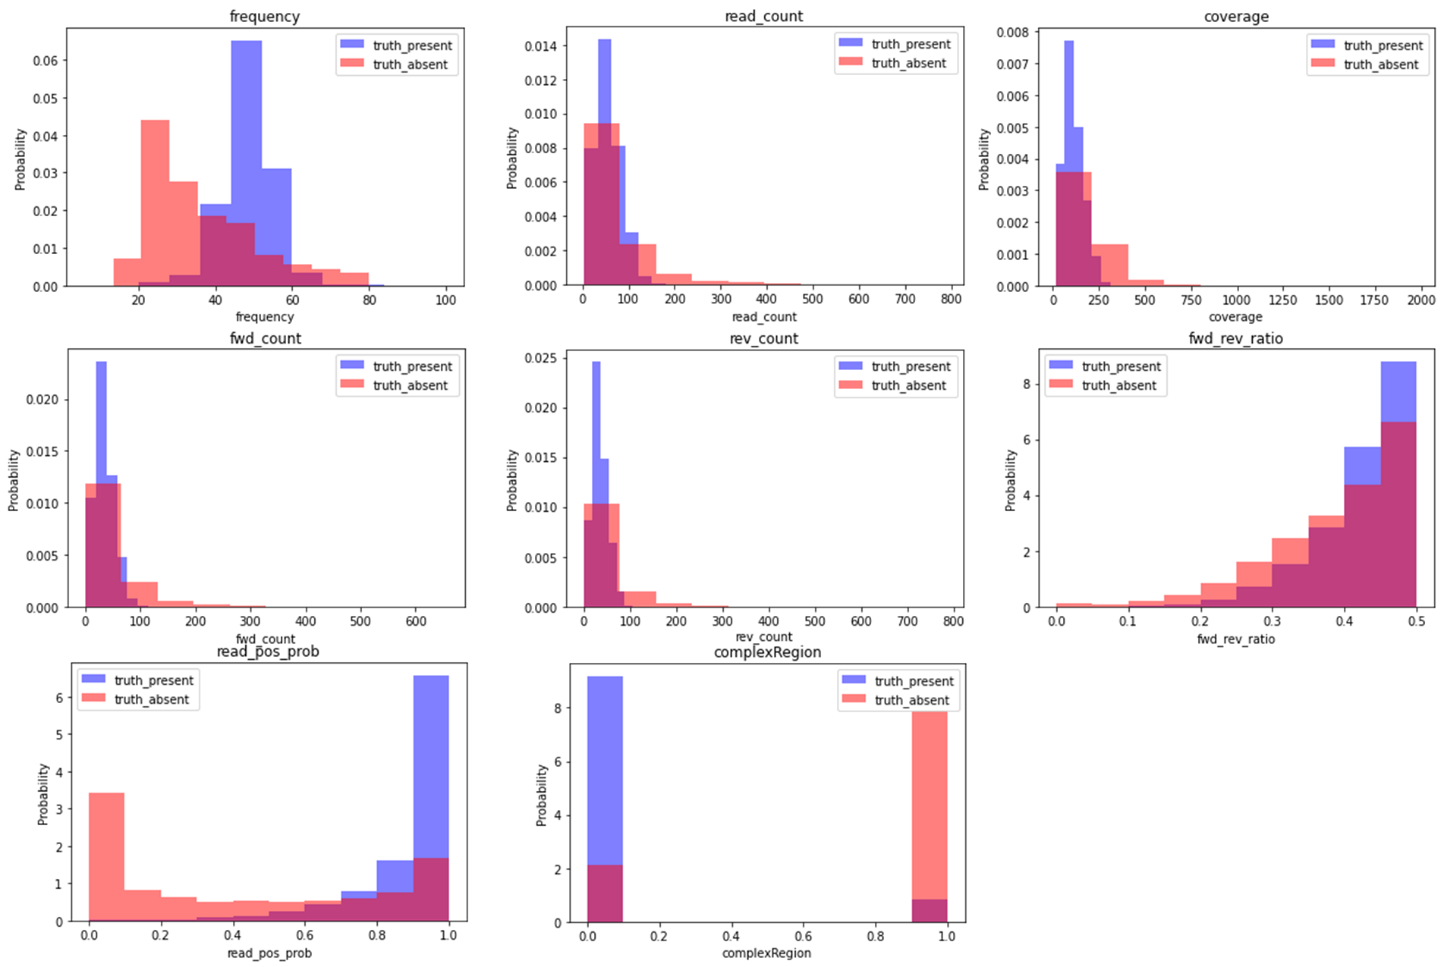


**Table S4. Summary of metrics for combinations of features and datasets**

| features | data type | model name | model name | TPR | FPR | TNR | FNR | ROC | Thred | Ss | F1 |
| --- | --- | --- | --- | --- | --- | --- | --- | --- | --- | --- | --- |
| **all** | **imbalanced** | **imb_all** | **GB** | **98.12** | **10.74** | **89.26** | **1.88** | **98.67** | **0.42** | **0.90** | **0.90** |
| key | imbalanced | imb_key | GB | 98.06 | 10.44 | 89.56 | 1.94 | 98.66 | 0.47 | 0.90 | 0.90 |
| key | SOS balanced | sos_key | GB | 97.84 | 9.76 | 90.24 | 2.16 | 98.66 | 12.77 | 0.87 | 0.89 |
| all | SOS balanced | sos_all | GB | 97.80 | 9.77 | 90.23 | 2.20 | 98.63 | 13.07 | 0.87 | 0.88 |
| key | SMOTE balanced | smote_key | GB | 98.35 | 17.96 | 82.04 | 1.65 | 98.40 | 6.39 | 0.93 | 0.87 |
| **key** | **SOS balanced** | **sos_key** | **LR** | **98.69** | **28.66** | **71.34** | **1.31** | **98.30** | **4.91** | **0.97** | **0.82** |
| all | SOS balanced | sos_all | LR | 98.77 | 29.95 | 70.05 | 1.23 | 98.30 | 4.64 | 0.97 | 0.82 |
| all | SMOTE balanced | smote_all | GB | 96.21 | 8.77 | 91.23 | 3.79 | 98.25 | 11.47 | 0.69 | 0.79 |
| **all** | **imbalanced** | **imb_all** | **RF** | **99.13** | **37.00** | **63.00** | **0.87** | **97.85** | **10.27** | **1.00** | **0.77** |
| key | imbalanced | imb_key | LR | 98.63 | 35.69 | 64.31 | 1.37 | 98.07 | 0.30 | 0.96 | 0.77 |
| all | imbalanced | imb_all | LR | 98.67 | 36.18 | 63.82 | 1.33 | 98.07 | 0.29 | 0.96 | 0.77 |
| key | imbalanced | imb_key | RF | 99.05 | 38.23 | 61.77 | 0.95 | 97.94 | 10.21 | 1.00 | 0.76 |
| all | SMOTE balanced | smote_all | LR | 98.85 | 38.82 | 61.18 | 1.15 | 98.18 | 4.55 | 0.98 | 0.75 |
| key | SMOTE balanced | smote_key | LR | 98.83 | 38.84 | 61.16 | 1.17 | 98.18 | 4.48 | 0.98 | 0.75 |
| all | SOS balanced | sos_all | RF | 99.23 | 39.58 | 60.42 | 0.77 | 97.88 | 10.44 | 1.00 | 0.75 |
| all | SMOTE balanced | smote_all | RF | 99.17 | 41.31 | 58.69 | 0.83 | 97.73 | 12.01 | 1.00 | 0.74 |
| key | SOS balanced | sos_key | RF | 99.05 | 42.06 | 57.94 | 0.95 | 97.90 | 10.16 | 1.00 | 0.73 |
| key | SMOTE balanced | smote_key | RF | 99.48 | 58.59 | 41.41 | 0.52 | 97.83 | 11.04 | 1.00 | 0.59 |

smote: Synthetic Minority Oversampling; selected models with the best overall performances are highlighted.

**Table S5. Summary of Sanger confirmation results of SNV calls that were classified as high-confidence by the two-tiered workflow**

| gene | nmid | cdot | chr | start | end | ref | alt | Exon # | Strand | Sanger confirm (Y/N) |
| --- | --- | --- | --- | --- | --- | --- | --- | --- | --- | --- |
| APC | NM_000038 | c.3920T>A | 5 | 112175211 | 112175211 | T | A | 16 | + | Y |
| ERCC2 | NM_000400 | c.1847G>C | 19 | 45856059 | 45856059 | C | G | 20 | - | Y |
| ERCC6 | NM_000124 | c.2167C>T | 10 | 50690735 | 50690735 | G | A | 10 | - | Y |
| GLA | NM_000169 | c.427G>A | X | 100656740 | 100656740 | C | T | 3 | - | Y |
| GPD1L | NM_015141 | c.839C>T | 3 | 32200588 | 32200588 | C | T | 6 | + | Y |
| IL7R | NM_002185 | c.651G>A | 5 | 35873695 | 35873695 | G | A | 5 | + | Y |
| MYH7 | NM_000257 | c.2890G>C | 14 | 23893148 | 23893148 | C | G | 23 | - | Y |
| MYL3 | NM_000258 | c.530A>G | 3 | 46899903 | 46899903 | T | C | 5 | - | Y |
| NGLY1 | NM_018297 | c.1201A>T | 3 | 25775422 | 25775422 | T | A | 8 | - | Y |
| PKP2 | NM_004572 | c.1114G>A | 12 | 33021917 | 33021917 | C | T | 4 | - | Y |
| SLC26A4 | NM_000441 | c.1151A>G | 7 | 107330570 | 107330570 | A | G | 10 | + | Y |
| ABCB4 | NM_000443 | c.1529A>G | 7 | 87069546 | 87069546 | T | C | 13 | - | Y |
| ACADSB | NM_001609 | c.443C>T | 10 | 124800121 | 124800121 | C | T | 4 | + | Y |
| ALOX12B | NM_001139 | c.1562A>G | 17 | 7979005 | 7979005 | T | C | 12 | - | Y |
| ALOXE3 | NM_021628 | c.1889C>T | 17 | 8006708 | 8006708 | G | A | 15 | - | Y |
| BARD1 | NM_000465 | c.2137G>A | 2 | 215593597 | 215593597 | C | T | 11 | - | Y |
| BCHE | NM_000055 | c.1253G>T | 3 | 165547569 | 165547569 | C | A | 2 | - | Y |
| BCHE | NM_000055 | c.293A>G | 3 | 165548529 | 165548529 | T | C | 2 | - | Y |
| BTD | NM_001370658 | c.1270G>C | 3 | 15686693 | 15686693 | G | C | 4 | + | Y |
| BTD | NM_001370658 | c.1308A>C | 3 | 15686731 | 15686731 | A | C | 4 | + | Y |
| BTD | NM_001370658 | c.451G>A | 3 | 15685874 | 15685874 | G | A | 4 | + | Y |
| CLCN1 | NM_000083 | c.2680C>T | 7 | 143048771 | 143048771 | C | T | 23 | + | Y |
| DOCK8 | NM_203447 | c.54-1G>T | 9 | 271626 | 271626 | G | T | 2 | + | Y |
| FBN1 | NM_000138 | c.7412C>G | 15 | 48717607 | 48717607 | G | C | 60 | - | Y |
| FKRP | NM_024301 | c.1073C>T | 19 | 47259780 | 47259780 | C | T | 4 | + | Y |
| G6PD | NM_000402 | c.1058T>C | X | 153761240 | 153761240 | A | G | 9 | - | Y |
| GJB2 | NM_004004 | c.101T>C | 13 | 20763620 | 20763620 | A | G | 2 | - | Y |
| HFE | NM_000410 | c.187C>G | 6 | 26091179 | 26091179 | C | G | 2 | + | Y |
| HFE | NM_000410 | c.845G>A | 6 | 26093141 | 26093141 | G | A | 4 | + | Y |
| KCNE2 | NM_172201 | c.229C>T | 21 | 35743006 | 35743006 | C | T | 2 | + | Y |
| LDLRAP1 | NM_015627 | c.605C>A | 1 | 25889633 | 25889633 | C | A | 6 | + | Y |
| MSH6 | NM_000179 | c.893G>A | 2 | 48026015 | 48026015 | G | A | 4 | + | Y |
| MUTYH | NM_001128425 | c.1187G>A | 1 | 45797228 | 45797228 | C | T | 13 | - | Y |
| MYH7 | NM_000257 | c.11C>T | 14 | 23902931 | 23902931 | G | A | 3 | - | Y |
| NAGA | NM_000262 | c.973G>A | 22 | 42457056 | 42457056 | C | T | 8 | - | Y |
| OCA2 | NM_000275 | c.1327G>A | 15 | 28230247 | 28230247 | C | T | 13 | - | Y |
| PCSK9 | NM_174936 | c.1180G>A | 1 | 55523187 | 55523187 | G | A | 7 | + | Y |
| POMGNT1 | NM_017739 | c.1539+1G>A | 1 | 46657769 | 46657769 | C | T | 17 | - | Y |
| PTEN | NM_000314 | c.935A>G | 10 | 89720784 | 89720784 | A | G | 8 | + | Y |
| SERPINA1 | NM_000295 | c.1096G>A | 14 | 94844947 | 94844947 | C | T | 5 | - | Y |
| SOS1 | NM_005633 | c.755T>C | 2 | 39278394 | 39278394 | A | G | 6 | - | Y |
| TCIRG1 | NM_006019 | c.1674-1G>A | 11 | 67816547 | 67816547 | G | A | 15 | + | Y |
| USH2A | NM_206933 | c.6902T>C | 1 | 216144022 | 216144022 | A | G | 36 | - | Y |
| ABCB4 | NM_000443 | c.2800G>A | 7 | 87041333 | 87041333 | C | T | 23 | 1 | Y |
| ACADM | NM_000016 | c.799G>A | 1 | 76215194 | 76215194 | G | A | 9 | -3 | Y |
| ACADM | NM_000016 | c.985A>G | 1 | 76226846 | 76226846 | A | G | 11 | -3 | Y |
| ALDOB | NM_000035 | c.448G>C | 9 | 104189856 | 104189856 | C | G | 5 | -3 | Y |
| ATM | NM_000051 | c.4784A>G | 11 | 108165661 | 108165661 | A | G | 32 | 0 | Y |
| ATP7B | NM_000053 | c.3316G>A | 13 | 52516618 | 52516618 | C | T | 15 | -2 | Y |
| ATP7B | NM_000053 | c.2605G>A | 13 | 52524268 | 52524268 | C | T | 11 | -3 | Y |
| ATP7B | NM_000053 | c.1995G>A | 13 | 52534410 | 52534410 | C | T | 7 | 0 | Y |
| ATP7B | NM_000053 | c.347T>C | 13 | 52549009 | 52549009 | A | G | 2 | 0 | Y |
| BBS1 | NM_024649 | c.1169T>G | 11 | 66293652 | 66293652 | T | G | 12 | -3 | Y |
| BBS2 | NM_031885 | c.1895G>C | 16 | 56530894 | 56530894 | C | G | 15 | -3 | Y |
| BRCA2 | NM_000059 | c.4819A>G | 13 | 32913311 | 32913311 | A | G | 11 | 0 | Y |
| CAPN3 | NM_000070 | c.2257G>A | 15 | 42702858 | 42702858 | G | A | 21 | 0 | Y |
| CYP1B1 | NM_000104 | c.1405C>T | 2 | 38298092 | 38298092 | G | A | 3 | -3 | Y |
| DPYD | NM_000110 | c.2846A>T | 1 | 97547947 | 97547947 | T | A | 22 | -3 | Y |
| FAH | NM_000137 | c.782C>T | 15 | 80465431 | 80465431 | C | T | 9 | -3 | Y |
| GJB2 | NM_004004 | c.109G>A | 13 | 20763612 | 20763612 | C | T | 2 | -3 | Y |
| GJB2 | NM_004004 | c.35G>T | 13 | 20763686 | 20763686 | C | A | 2 | -3 | Y |
| GLA | NM_000169 | c.352C>T | X | 100658816 | 100658816 | G | A | 2 | 0 | Y |
| GLDC | NM_000170 | c.2216G>A | 9 | 6554768 | 6554768 | C | T | 19 | -3 | Y |
| HBB | NM_000518 | c.316-197C>T | 11 | 5247153 | 5247153 | G | A | i2 | -3 | Y |
| HLCS | NM_000411 | c.1519+5G>A | 21 | 38139514 | 38139514 | C | T | 8 | -3 | Y |
| HSD17B4 | NM_000414 | c.743G>A | 5 | 118829516 | 118829516 | G | A | 11 | 0 | Y |
| MEFV | NM_000243 | c.2177T>C | 16 | 3293310 | 3293310 | A | G | 10 | -3 | Y |
| MEFV | NM_000243 | c.2082G>A | 16 | 3293405 | 3293405 | C | T | 10 | -3 | Y |
| MPL | NM_005373 | c.305G>C | 1 | 43804305 | 43804305 | G | C | 3 | -3 | Y |
| NBN | NM_002485 | c.127C>T | 8 | 90994994 | 90994994 | G | A | 2 | -3 | Y |
| NDUFAF5 | NM_024120 | c.519+4A>G | 20 | 13779150 | 13779150 | A | G | 6 | 1 | Y |
| NPHS1 | NM_004646 | c.565G>T | 19 | 36341309 | 36341309 | C | A | 5 | -3 | Y |
| NPHS2 | NM_014625 | c.686G>A | 1 | 179526214 | 179526214 | C | T | 5 | -1 | Y |
| PAH | NM_000277 | c.1068C>G | 12 | 103237555 | 103237555 | G | C | 11 | -3 | Y |
| PAH | NM_000277 | c.688G>A | 12 | 103248932 | 103248932 | C | T | 6 | -3 | Y |
| PMM2 | NM_000303 | c.422G>A | 16 | 8905010 | 8905010 | G | A | 5 | -3 | Y |
| PMM2 | NM_000303 | c.713G>A | 16 | 8941654 | 8941654 | G | A | 8 | 0 | Y |
| RAG1 | NM_000448 | c.1566G>T | 11 | 36596420 | 36596420 | G | T | 2 | -3 | Y |
| RPGRIP1 | NM_020366 | c.3358A>G | 14 | 21811213 | 21811213 | A | G | 22 | 0 | Y |
| SMPD1 | NM_000543 | c.1550A>T | 11 | 6415491 | 6415491 | A | T | 6 | 1 | Y |
| USH2A | NM_206933 | c.12145G>A | 1 | 215853640 | 215853640 | C | T | 62 | -1 | Y |
| ABCC8 | NM_000352 | c.3976G>A | 11 | 17418752 | 17418752 | C | T | 32 | 0 | Y |
| ACSF3 | NM_174917 | c.1081G>A | 16 | 89180850 | 89180850 | G | A | 6 | 0 | Y |
| ASL | NM_000048 | c.571C>T | 7 | 65551777 | 65551777 | C | T | 8 | -3 | Y |
| CPT2 | NM_000098 | c.149C>A | 1 | 53662764 | 53662764 | C | A | 1 | -3 | Y |
| DHCR7 | NM_001360 | c.1342G>A | 11 | 71146507 | 71146507 | C | T | 9 | -3 | Y |
| FKRP | NM_024301 | c.826C>A | 19 | 47259533 | 47259533 | C | A | 4 | -3 | Y |
| GALK1 | NM_000154 | c.1036G>A | 17 | 73754362 | 73754362 | C | T | 7 | -2 | Y |
| GCDH | NM_000159 | c.262C>A | 19 | 13002779 | 13002779 | C | A | 4 | -2 | Y |
| LDLR | NM_000527 | c.682G>T | 19 | 11216264 | 11216264 | G | T | 4 | -3 | Y |
| MYBPC3 | NM_000256 | c.1468G>A | 11 | 47364285 | 47364285 | C | T | 16 | 0 | Y |
| MYL3 | NM_000258 | c.170C>A | 3 | 46902303 | 46902303 | G | T | 3 | 0 | Y |
| TSEN54 | NM_207346 | c.919G>T | 17 | 73518081 | 73518081 | G | T | 8 | -3 | Y |
